# Supplementary figures and images for: Dry Eye Parameters and Lid Geometry in Adults Born Extremely, Very, and Moderately Preterm with and without ROP: Results from the Gutenberg Prematurity Eye Study
Source: MDPI journal article supplement (doi:10.3390/jcm11102702), 2022-05-10

## Supplementary Figure S1

### Gutenberg Prematurity Eye Study design.

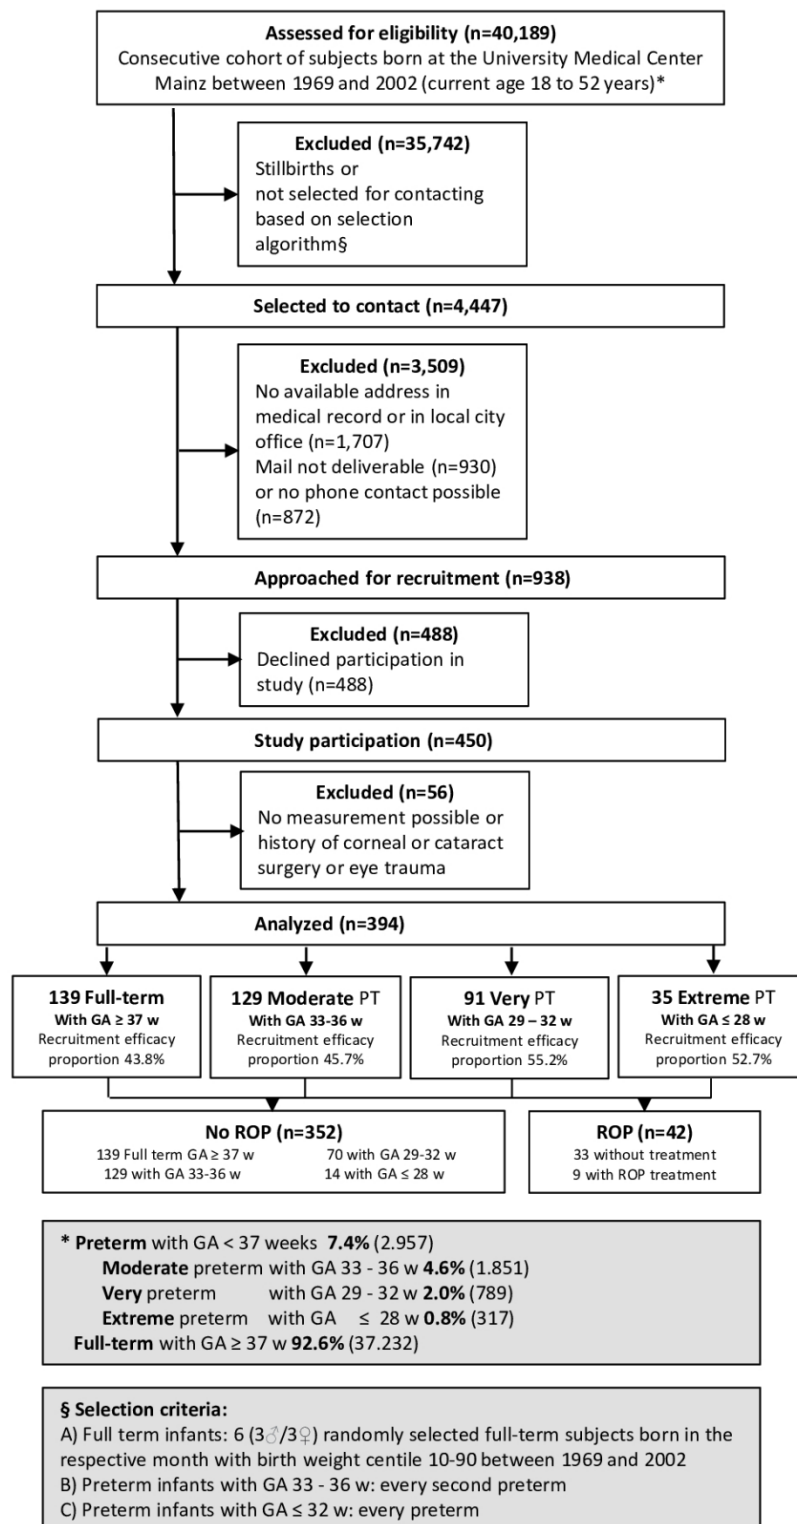

Supplement: s1 [file s1]
